# Supplementary material for: Site-specific release of reactive oxygen species from ordered arrays of microchambers based on polylactic acid and carbon nanodots
Source: Royal Society of Chemistry journal article supplement (doi:10.1039/d0tb01148g), 2020-01-01
Supplement: d0tb01148g1.pdf [file d0tb01148g1.pdf]

ARTICLE

## Site-specific release of reactive oxygen species from ordered arrays of microchambers based on polylactic acid and carbon nanodots

Received 00th January 20xx,  
Accepted 00th January 20xx

DOI: 10.1039/x0xx00000x

Alexey V. Ermakov<sup>\*a,b</sup>, Valeriya L. Kudryavtseva<sup>c,d</sup>, Polina A. Demina<sup>a</sup>, Roman A. Verkhovskii<sup>a</sup>, Jiaxin Zhang<sup>c</sup>, Ekaterina V. Lengert<sup>a</sup>, Andrey V. Sapelkin<sup>a,c</sup>, Irina Yu. Goryacheva<sup>a</sup>, Gleb B. Sukhorukov<sup>a,b,c</sup>

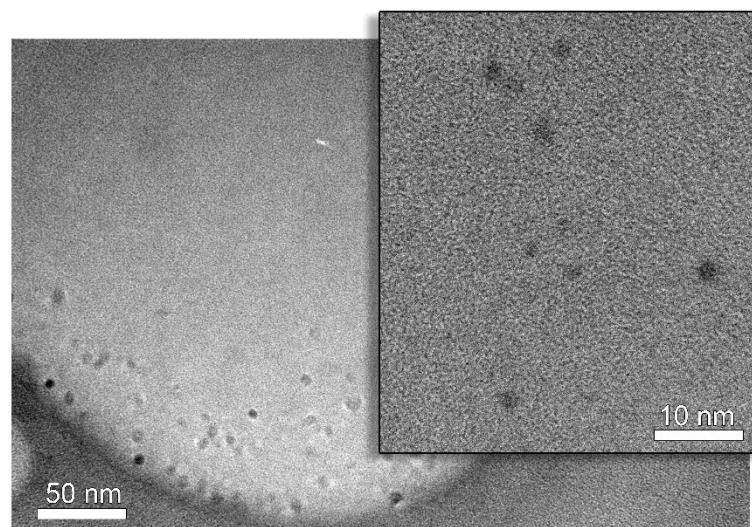

Fig. S1 Typical High-resolution TEM images of CND obtained from dextran sulfate.

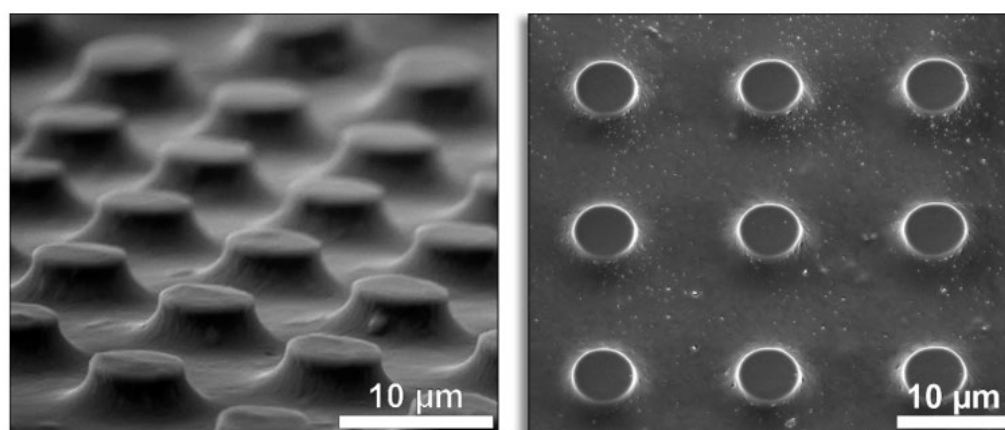

Fig. S2 Typical SEM images of the sealed sodium percarbonate containing PLA (left) and PLA/CND (right) microchambers.

<sup>a</sup> N.G. Chernyshevsky Saratov State University, 83 Astrakhanskaya Street Saratov 410012, Russia

<sup>b</sup> I.M. Sechenov First Moscow State Medical University, Moscow 119991, Russia

<sup>c</sup> Queen Mary University of London, Mile End Road, London E1 4NS, UK

<sup>d</sup> National Research Tomsk Polytechnic University, 30 Lenin Avenue, Tomsk 634050, Russian

Electronic Supplementary Information (ESI) available: [details of any supplementary information available should be included here]. See DOI: 10.1039/x0xx00000x

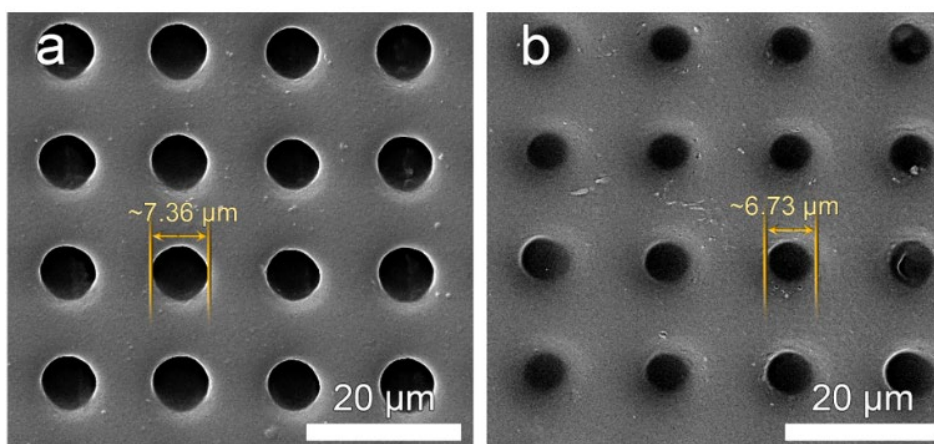

Fig. S3 SEM images of wells before (a) and after (b) covering with PLA layer.

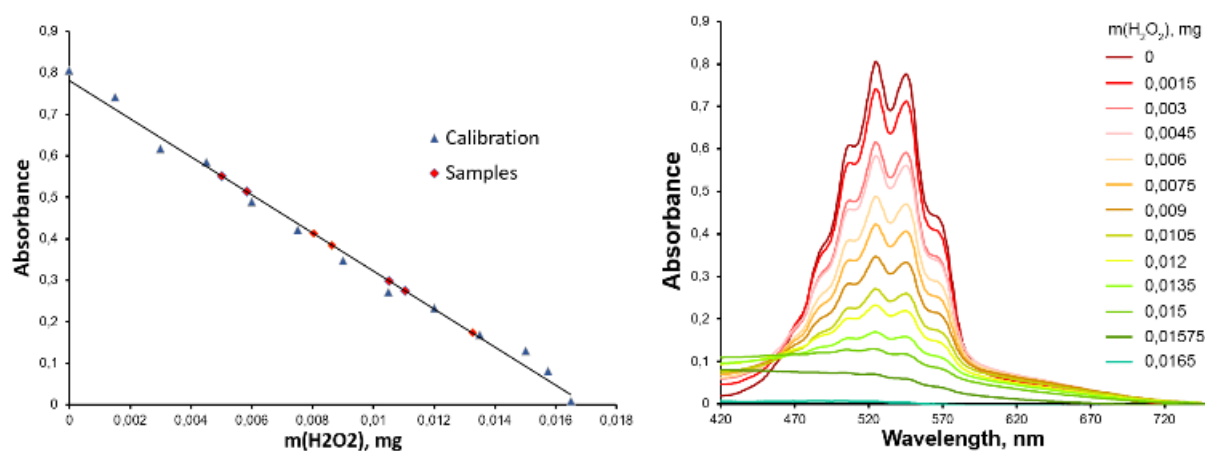

Fig. S4 Spectrums of potassium permanganate after reaction with H<sub>2</sub>O<sub>2</sub> of different mass and corresponding calibration curve. Green and red points show mass of H<sub>2</sub>O<sub>2</sub> found in microchambers arrays.

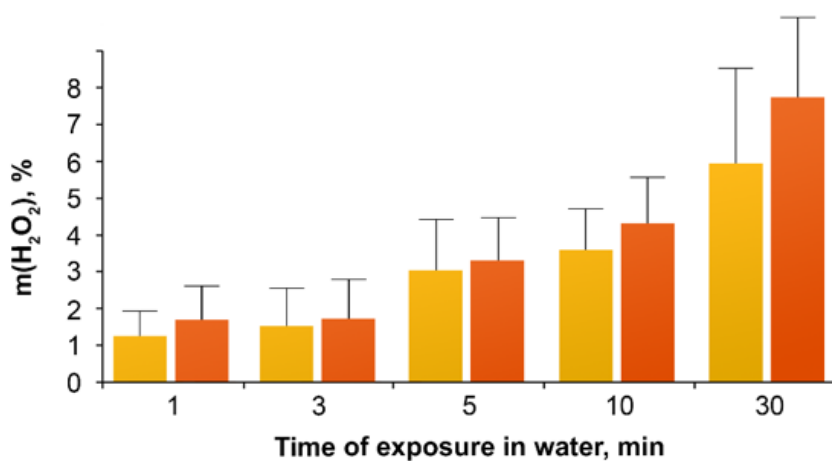

Fig. S5 Graph profile of the spontaneous release in the first 30 min of microchambers' exposure in water.

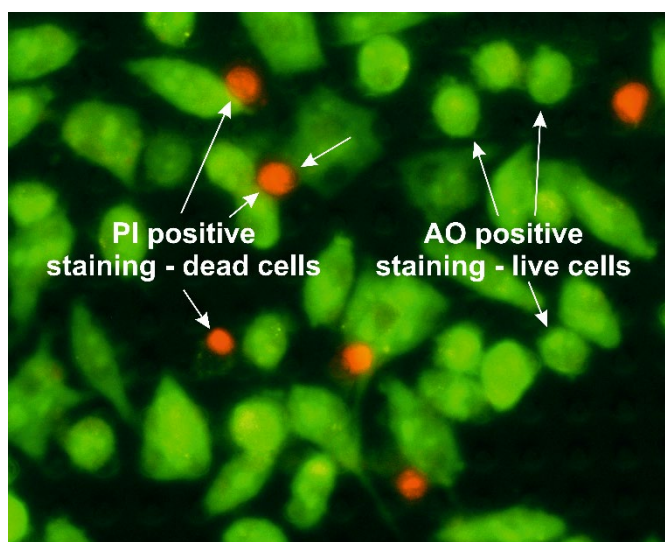

**Fig. S6** Fluorescent image of live and dead L929 cells stained with AO/PI (green cells – AO positive staining – live cells; red cells – PI positive staining – dead cells) adhered to the surface of microchambers.

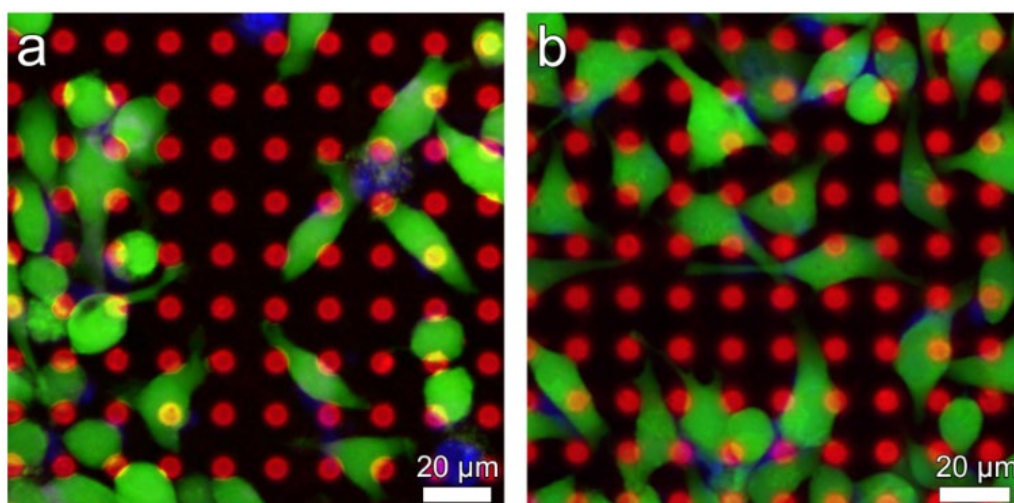

**Fig. S7** CLSM images of L929 cells stained with Calcein-AM adhered to the surface of Nile red-labelled empty microchambers (a) and loaded with sodium percarbonate (b).
